WINTER 2017 | VOLUME 15 | NUMBER 1

# Focus

The Journal of Lifelong Learning in Psychiatry

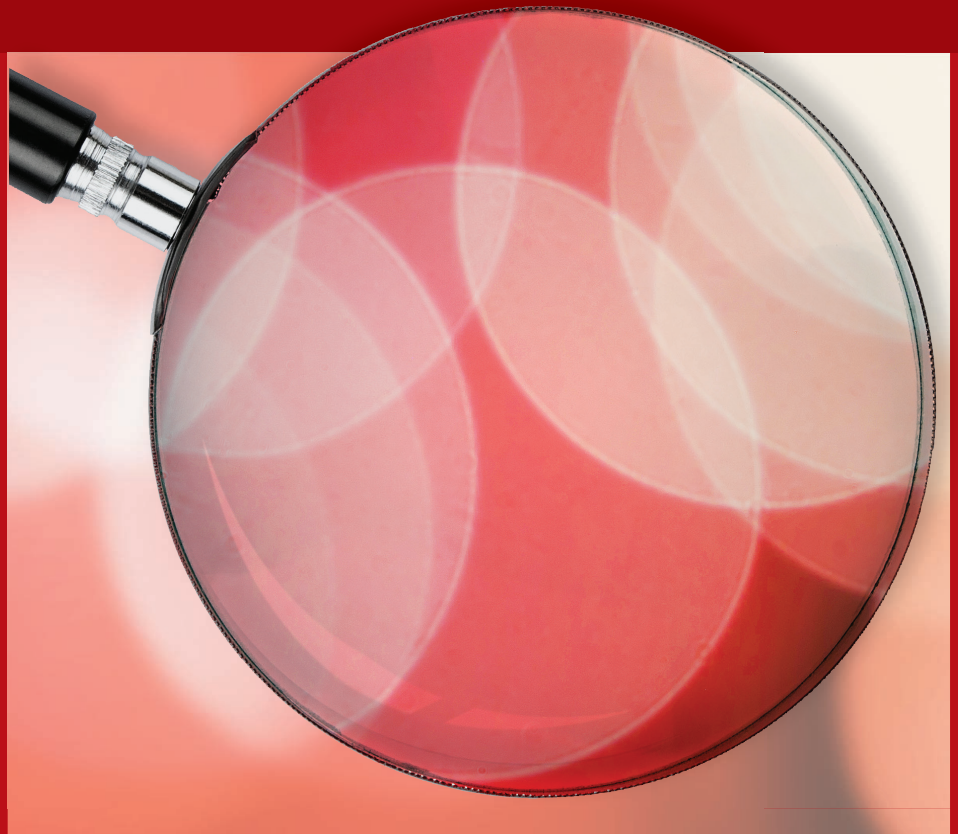

## Neurocognitive Disorders in Geriatric Psychiatry

Guest Editor: William M. McDonald, M.D.

AMERICAN  
PSYCHIATRIC  
ASSOCIATION 

[focus.psychiatryonline.org](http://focus.psychiatryonline.org)
