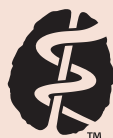

## APA Publishing

### Publisher

Rebecca D. Rinehart  
*Editorial Director, Journals*  
Michael D. Roy  
*Managing Editor, Journals*  
Demarie S. Jackson  
*Production Manager, Journals*  
Wendy Lieberman Taylor

## APA Department of Continuing Medical Education

*Associate Director, Focus*  
Kristen Moeller  
*Editorial Services Manager*  
Miriam Epstein  
*Editorial Manager, CME and MOC  
Examinations and Books*  
Ann Thomas

*Focus* (ISSN 1541-4094) is published quarterly by American Psychiatric Association Publishing. Printed in the United States.

Periodicals postage paid at Arlington, VA, and additional mailing offices. POSTMASTER: Send address changes to *Focus*, Circulation Department, American Psychiatric Association Publishing, 1000 Wilson Blvd., Suite 1825, Arlington, VA 22209-3901.

## Subscriptions

U.S. APA member \$394, U.S. non-member \$616. For additional subscription options, including international and student rates, contact Customer Service at (703) 907-7300 or (800) 368-5777.

## Officers of the Association

Maria A. Oquendo, M.D., Ph.D., *President*  
Anita S. Everett, M.D., *President-Elect*  
Altha J. Stewart, M.D., *Secretary*  
Saul Levin, M.D., M.P.A., *CEO and Medical Director*

## Editorial Offices

Telephone: (703) 907-8637  
Fax: (703) 907-7849  
Journal Web site: [focus.psychiatryonline.org](http://focus.psychiatryonline.org)  
*Focus* CME: [psychiatryonline.org/cme](http://psychiatryonline.org/cme)

## Change of Address and Assistance With Subscriptions

Contact Customer Service at (703) 907-7322 or (800) 368-5777 or e-mail [appi@psych.org](mailto:appi@psych.org).

## CME

Telephone: (703) 907-8637, Fax: (703) 907-7849, Email: [educme@psych.org](mailto:educme@psych.org)

## Online Access

Call (800) 368-5777 or e-mail [appi@psych.org](mailto:appi@psych.org) for assistance with online access to *Focus* and CME activities.

Copyright © 2017, American Psychiatric Association

## Editor

Mark Hyman Rapaport, M.D.  
*Atlanta, Georgia*

## Patient Management Exercise

Ian A. Cook, M.D.  
*Los Angeles, California*  
B. Harrison Levine, M.D., M.P.H.  
*Watertown, New York*

## Ethics Commentary

Laura B. Dunn, M.D.  
*Palo Alto, California*  
Laura Weiss Roberts, M.D.  
*Palo Alto, California*

## Communication Commentary

Dorothy E. Stubbe, M.D.  
*New Haven, Connecticut*

## Safety Commentary

Yad M. Jabbarpour, M.D.  
*Catawba, Virginia*

## Senior Advisory Board

Carol A. Bernstein, M.D.  
*New York, New York*  
Kathleen T. Brady, M.D., Ph.D.  
*Charleston, South Carolina*  
Peter F. Buckley, M.D.  
*Augusta, Georgia*  
Glen O. Gabbard, M.D.  
*Houston, Texas*  
Ira M. Lesser, M.D.  
*Torrance, California*  
Charles F. Reynolds III, M.D.  
*Pittsburgh, Pennsylvania*  
Pedro Ruiz, M.D.  
*Houston, Texas*  
Stephen C. Scheiber, M.D.  
*Glenview, Illinois*  
Daniel K. Winstead, M.D.  
*New Orleans, Louisiana*  
Joel Yager, M.D.  
*Denver, Colorado*

## Editorial Board

Richard Balon, M.D.  
*Rochester Hills, Michigan*  
Joseph A. Cheong, M.D.  
*Nashville, Tennessee*  
Raymond Lam, M.D., F.R.C.P.C.  
*Vancouver, Canada*  
Avram H. Mack, M.D.  
*Philadelphia, Pennsylvania*  
Vishal Madaan, M.D., M.B.B.S.  
*Charlottesville, Virginia*

David Mischoulon, M.D., Ph.D.  
*Boston, Massachusetts*  
Francisco A. Moreno, M.D.  
*Tucson, Arizona*  
Philip R. Muskin, M.D.  
*New York, New York*  
Michele T. Pato, M.D., M.P.H.  
*Brooklyn, New York*  
Jeffrey Rakofsky, M.D.  
*Atlanta, Georgia*  
Lori E. Raney, M.D.  
*Dolores, Colorado*  
Victor I. Reus, M.D.  
*San Francisco, California*  
James W. Thompson, M.D., M.P.H.  
*Palm Beach, Florida*  
Marcia L. Verduin, M.D.  
*Orlando, Florida*  
Sidney Zisook, M.D.  
*San Diego, California*

## Associate Editors eFOCUS

David L. Fogelson, M.D.  
*Los Angeles, California*  
Robert J. Boland, M.D.  
*Boston, Massachusetts*

## Focus Self-Assessment Editorial Board

Robert J. Boland, M.D.  
*Boston, Massachusetts*  
Arden D. Dingle, M.D.  
*Harlingen, Texas*  
Laura Fochtmann, M.D.  
*Stony Brook, New York*  
James W. Jefferson, M.D.  
*Madison, Wisconsin*  
Vishal Madaan, M.D.  
*Charlottesville, Virginia*  
Annette M. Matthews, M.D.  
*Portland, Oregon*  
Lindsay J. Moskowitz, M.D.  
*New Hyde Park, New York*  
Shawn Sidhu, M.D.  
*Albuquerque, New Mexico*  
Marcia L. Verduin, M.D.  
*Orlando, Florida*  
Randon S. Welton, M.D.  
*Dayton, Ohio*  
Eric R. Williams, M.D.  
*Columbia, South Carolina*

**Editor Emerita**  
Deborah J. Hales, M.D.  
*Washington, D.C.*
