# psychiatryonline.org

Your Destination for Lifelong Learning in Psychiatry

Your one-stop resource for information on diagnosis, treatment, guidelines, the latest research, and breaking news from the field.

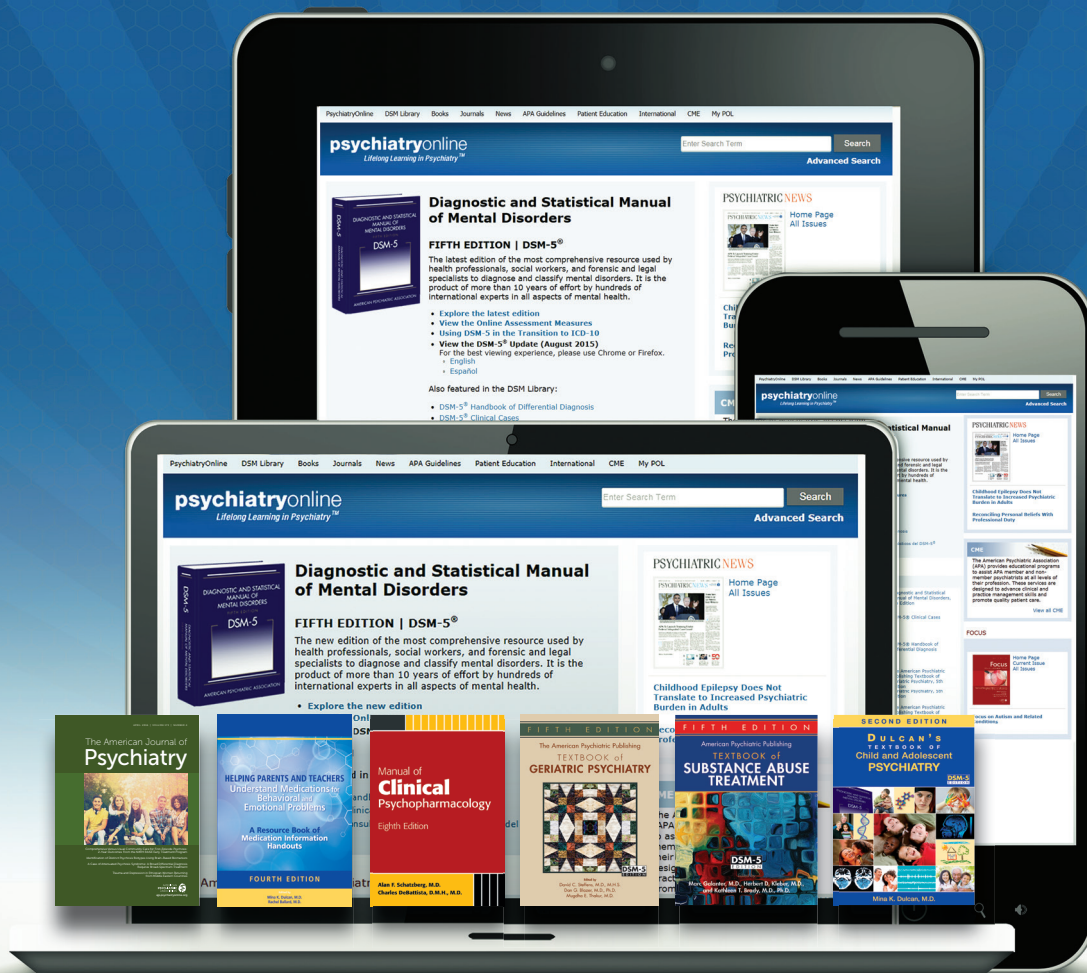

Subscribe to products individually or to the DSM Select package that includes the DSM-5® library, books and select journals.

Go to [www.appi.org](http://www.appi.org) to subscribe.

Institutional subscription options are available.

For more information contact: [institutions@psych.org](mailto:institutions@psych.org); 800-368-5777 ext. 7874

AMERICAN  
PSYCHIATRIC  
ASSOCIATION  
PUBLISHING

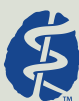

[www.appi.org](http://www.appi.org) • 1-800-368-5777 • [appi@psych.org](mailto:appi@psych.org)

AH1703A

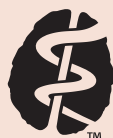

## APA Publishing

### Publisher

Rebecca D. Rinehart  
*Editorial Director, Journals*  
Michael D. Roy  
*Managing Editor, Journals*  
Demarie S. Jackson  
*Production Manager, Journals*  
Wendy Lieberman Taylor

## APA Department of Continuing Medical Education

*Associate Director, Focus*  
Kristen Moeller  
*Editorial Services Manager*  
Miriam Epstein  
*Editorial Manager, CME and MOC  
Examinations and Books*  
Ann Thomas

*Focus* (ISSN 1541-4094) is published quarterly by American Psychiatric Association Publishing. Printed in the United States.

Periodicals postage paid at Arlington, VA, and additional mailing offices. POSTMASTER: Send address changes to *Focus*, Circulation Department, American Psychiatric Association Publishing, 1000 Wilson Blvd., Suite 1825, Arlington, VA 22209-3901.

## Subscriptions

U.S. APA member \$394, U.S. non-member \$616. For additional subscription options, including international and student rates, contact Customer Service at (703) 907-7300 or (800) 368-5777.

## Officers of the Association

Maria A. Oquendo, M.D., Ph.D., *President*  
Anita S. Everett, M.D., *President-Elect*  
Altha J. Stewart, M.D., *Secretary*  
Saul Levin, M.D., M.P.A., *CEO and Medical Director*

## Editorial Offices

Telephone: (703) 907-8637  
Fax: (703) 907-7849  
Journal Web site: [focus.psychiatryonline.org](http://focus.psychiatryonline.org)  
*Focus* CME: [psychiatryonline.org/cme](http://psychiatryonline.org/cme)

## Change of Address and Assistance With Subscriptions

Contact Customer Service at (703) 907-7322 or (800) 368-5777 or e-mail [appi@psych.org](mailto:appi@psych.org).

## CME

Telephone: (703) 907-8637, Fax: (703) 907-7849, Email: [educme@psych.org](mailto:educme@psych.org)

## Online Access

Call (800) 368-5777 or e-mail [appi@psych.org](mailto:appi@psych.org) for assistance with online access to *Focus* and CME activities.

Copyright © 2017, American Psychiatric Association

## Editor

Mark Hyman Rapaport, M.D.  
*Atlanta, Georgia*

## Patient Management Exercise

Ian A. Cook, M.D.  
*Los Angeles, California*  
B. Harrison Levine, M.D., M.P.H.  
*Watertown, New York*

## Ethics Commentary

Laura B. Dunn, M.D.  
*Palo Alto, California*  
Laura Weiss Roberts, M.D.  
*Palo Alto, California*

## Communication Commentary

Dorothy E. Stubbe, M.D.  
*New Haven, Connecticut*

## Safety Commentary

Yad M. Jabbarpour, M.D.  
*Catawba, Virginia*

## Senior Advisory Board

Carol A. Bernstein, M.D.  
*New York, New York*  
Kathleen T. Brady, M.D., Ph.D.  
*Charleston, South Carolina*  
Peter F. Buckley, M.D.  
*Augusta, Georgia*  
Glen O. Gabbard, M.D.  
*Houston, Texas*  
Ira M. Lesser, M.D.  
*Torrance, California*  
Charles F. Reynolds III, M.D.  
*Pittsburgh, Pennsylvania*  
Pedro Ruiz, M.D.  
*Houston, Texas*  
Stephen C. Scheiber, M.D.  
*Glenview, Illinois*  
Daniel K. Winstead, M.D.  
*New Orleans, Louisiana*  
Joel Yager, M.D.  
*Denver, Colorado*

## Editorial Board

Richard Balon, M.D.  
*Rochester Hills, Michigan*  
Joseph A. Cheong, M.D.  
*Nashville, Tennessee*  
Raymond Lam, M.D., F.R.C.P.C.  
*Vancouver, Canada*  
Avram H. Mack, M.D.  
*Philadelphia, Pennsylvania*  
Vishal Madaan, M.D., M.B.B.S.  
*Charlottesville, Virginia*

David Mischoulon, M.D., Ph.D.  
*Boston, Massachusetts*  
Francisco A. Moreno, M.D.  
*Tucson, Arizona*

Philip R. Muskin, M.D.  
*New York, New York*  
Michele T. Pato, M.D., M.P.H.  
*Brooklyn, New York*

Jeffrey Rakofsky, M.D.  
*Atlanta, Georgia*

Lori E. Raney, M.D.  
*Dolores, Colorado*  
Victor I. Reus, M.D.  
*San Francisco, California*

James W. Thompson, M.D., M.P.H.  
*Palm Beach, Florida*  
Marcia L. Verduin, M.D.  
*Orlando, Florida*  
Sidney Zisook, M.D.  
*San Diego, California*

## Associate Editors eFOCUS

David L. Fogelson, M.D.  
*Los Angeles, California*  
Robert J. Boland, M.D.  
*Boston, Massachusetts*

## Focus Self-Assessment Editorial Board

Robert J. Boland, M.D.  
*Boston, Massachusetts*  
Arden D. Dingle, M.D.  
*Harlingen, Texas*  
Laura Fochtmann, M.D.  
*Stony Brook, New York*  
James W. Jefferson, M.D.  
*Madison, Wisconsin*  
Vishal Madaan, M.D.  
*Charlottesville, Virginia*  
Annette M. Matthews, M.D.  
*Portland, Oregon*  
Lindsay J. Moskowitz, M.D.  
*New Hyde Park, New York*  
Shawn Sidhu, M.D.  
*Albuquerque, New Mexico*  
Marcia L. Verduin, M.D.  
*Orlando, Florida*  
Randon S. Welton, M.D.  
*Dayton, Ohio*  
Eric R. Williams, M.D.  
*Columbia, South Carolina*

**Editor Emerita**  
Deborah J. Hales, M.D.  
*Washington, D.C.*

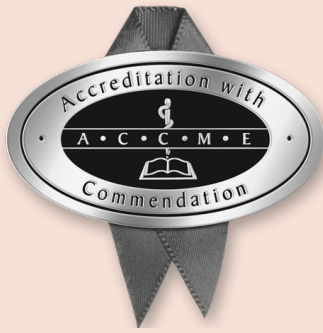

# Focus

The Journal of Lifelong Learning in Psychiatry

## EDUCATIONAL OBJECTIVES

*Focus*, the APA clinical review and continuing medical education (CME) journal, is designed as a personal study resource to help practicing psychiatrists keep abreast of significant advances in the field, with particular attention to clinical practice.

With each issue, participants review current knowledge, recognize gaps in learning, and increase their understanding of an important topic in the field of psychiatry.

Participants also can prepare for an annual self-assessment designed to aid the physician in addressing areas where more study is needed to enhance management of patients.

## TO EARN CME CREDIT

Each issue, prepared by distinguished faculty who are recognized leaders in their fields, incorporates a CME component. To earn CME credit for *Focus*, subscribers should read through the material presented in each issue. After reading the material, complete the CME Quiz online at [focus.psychiatryonline.org](http://focus.psychiatryonline.org), and earn credit with a passing score of 60%.

## ACCREDITATION AND DESIGNATION

The American Psychiatric Association is accredited by the Accreditation Council for Continuing Medical Education (ACCME) to provide CME for physicians. The APA designates this journal-based CME activity for a maximum of 5 AMA PRA Category 1 credits™. Physicians should claim only the credit commensurate with the extent of their participation in the activity.

Neither the American Psychiatric Association nor American Psychiatric Association Publishing holds itself responsible for statements made in its publications by contributors. Unless so stated, material in *Focus* does not reflect the endorsement, official attitude, or position of the American Psychiatric Association, American Psychiatric Association Publishing, or the journal's Editorial Board.

Material published in the journals of the American Psychiatric Association is protected by copyright and all rights are reserved. Material may not be reproduced in any form or by any means without written permission from the copyright owner. For permission to reproduce material from American Psychiatric Association journals, please visit [www.appi.org/CustomerService/Pages/Permissions.aspx](http://www.appi.org/CustomerService/Pages/Permissions.aspx) for more information. Permission can also be secured through the Copyright Clearance Center ([www.copyright.com](http://www.copyright.com)). For bulk reprints, please contact Jane Cha at 703-907-7889; e-mail: [jcha@psych.org](mailto:jcha@psych.org).

This consent does not extend to other kinds of copying, such as copying for general distribution, for advertising or promotional purposes, for creating new collective works, or for resale. Permission need not be obtained for photocopying isolated articles for nonprofit classroom or library reserve use; all fees associated with such permission are waived.

"Lifelong Learning in Psychiatry" is an evolving series of educational initiatives developed by the American Psychiatric Association to meet the changing needs of psychiatrists for the 21st century.

*Focus* offers clinical reviews and original research for practicing psychiatrists to keep abreast of significant advances in the field. Developed as part of APA's "Lifelong Learning in Psychiatry" series—educational initiatives to meet the changing needs of psychiatrists for the 21st century—*Focus* has as its goal the dissemination of up-to-date information while facilitating lifelong study skills and critical self-assessment for improving patient care and preparation for maintenance of certification. Each issue is designed as a personal study resource with particular attention to clinical practice and offers opportunities to earn AMA PRA Category 1 Credit™.

## The American Board of Psychiatry and Neurology

The American Board of Psychiatry and Neurology has reviewed *Focus: The Journal of Lifelong Learning in Psychiatry* and the *Focus Self-Assessment Examination* and has approved this program as part of a comprehensive lifelong learning and self-assessment program, which is mandated by the American Board of Medical Specialties as a necessary component of maintenance of certification.

## Royal College of Physicians and Surgeons of Canada

The *Focus Self-Assessment Examination* (Vol. 14) is an accredited self-assessment program (Section 3) as defined by the Maintenance of Certification Program of the Royal College of Physicians and Surgeons of Canada and was approved by the Canadian Psychiatric Association on Oct. 1, 2016. This program expires Oct. 31, 2019. Remember to visit MAINPORT (<https://www.mainport.org/mainport/>) to record your learning and outcomes. You may claim a maximum of 24 hours (credits are automatically calculated).

## American Academy of Physician Assistants

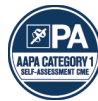

The *Focus Self-Assessment CME Program* for Volume 12 has been reviewed and is approved for a maximum of 24 AAPA Category 1 Self-Assessment CME credits by the Physician Assistant Review Panel. Approval is valid until Oct. 31, 2017. Physician assistants should claim credit commensurate with only the extent of their participation in the activity. This program was planned in accordance with AAPA's CME Standards.

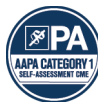

The Performance Improvement CME programs marked on the next page with an asterisk have been reviewed and are approved for a maximum of 20.00 AAPA Category 1 PI-CME credits by the Physician Assistant Review Panel. Total number of approved credits for each stage of this PI-CME program are as follows: Stage A: 5.0 AAPA Category 1 PI-CME credits; Stage B: 5.0 AAPA Category 1 PI-CME credits; Stage C: 5.0 AAPA Category 1 PI-CME credits. Bonus for completion of all three stages: 5.0 AAPA Category 1 PI-CME credits. Approval is valid until dates listed below. Physician Assistants should claim only the credit commensurate with the extent of their participation in the activity. This program was planned in accordance with AAPA's CME Standards.

**Editor and Advisor Program Planner Disclosure Listing for *Focus*, eFOCUS and *Focus*, Self-Assessment Editors, Associate Editors, Editorial Boards, and staff:**

Peter F. Buckley, M.D., Ph.D., Co-investigator: Alkermes, Ameritox, Auspex Pharmaceuticals, Avanir, Otsuka. Ian A. Cook, M.D., Research support: AHRQ/ APA, NeoSync, NIH; Advisor/Consultant: NeuroSigma, NIH (ITVA member), VA (DSM member); Intellectual property: assigned to UCLA and licensed to NeuroSigma; Stock options: NeuroSigma. James W. Jefferson, M.D., Stock shareholder: Bristol-Myers Squibb, GlaxoSmithKline, Healthcare Technology Systems, SciClone. Raymond Lam, M.D. Advisor/consultant: Asia-Pacific Economic Cooperation, Bristol-Myers Squibb, Janssen, Lundbeck, Pfizer, Takeda. Speaker/speakers bureau: AstraZeneca, Lundbeck, Otsuka; Research support: Bristol-Myers Squibb, Janssen, Lundbeck, Pfizer, St. Jude Medical. Vishal Madaan, M.D., M.B.B.S., Research support: Forest, Pfizer, Purdue, Shire, Sunovion, Supernus. Charles F. Reynolds III, M.D., Pharmaceutical supplies for NIH-sponsored clinical trials from Bristol-Myers Squibb, Pfizer. Laura Weiss Roberts, M.D., M.A., Owner, Terra Nova Learning Systems. Marcia L. Verduin, M.D., Scientific Advisory Board, Lake Nona Life Project, sponsored by Lake Nona Institute and Johnson & Johnson.

**Editors and Members of the Editorial Boards of *Focus* and the *Focus* Self-Assessment and staff listed below report no disclosures:**

Richard Balon, M.D., Carol A. Bernstein, M.D., Robert J. Boland, M.D., Kathleen T. Brady, M.D., Josepha A. Cheong, M.D., Arden D. Dingle, M.D., Laura B. Dunn, M.D., Laura Fochtmann, M.D., David L. Fogelson, M.D., Glen O. Gabbard, M.D., Tristan Gorrindo, M.D., Yad M. Jabbarpour, M.D., Ira M. Lesser, M.D., B. Harrison Levine, M.D., Avram H. Mack, M.D., Annette M. Matthews, M.D., David Mischoulon, M.D., Ph.D., Kristen Moeller, Francisco A. Moreno, M.D., Lindsay J. Moskowitz, M.D., Philip R. Muskin, M.D., Michele T. Pato, M.D., M.P.H., Jeffrey J. Rakofsky, M.D., Lori E. Raney, M.D., Mark H. Rapaport, M.D., Victor I. Reus, M.D., Pedro Ruiz, M.D., Stephen C. Scheiber, M.D., Shawn Sidhu, M.D., Dorothy E. Stubbe, M.D., James W. Thompson, M.D., M.P.H., Randon S. Welton, M.D., Eric R. Williams, M.D., Daniel K. Winstead, M.D., Joel Yager, M.D., Sidney Zisook, M.D.

Contact American Psychiatric Association, Department of CME, educme@psych.org for information regarding revised end dates and updates to the clinical modules. All Performance in Practice modules published in *Focus* are available to all *Focus* subscribers.

**Improvement in Medical Practice/Performance in Practice (PIP) Clinical Modules Published in *Focus***

The American Board of Psychiatry and Neurology has approved the following *Focus* Performance in Practice clinical chart review tools of the American Psychiatric Association as Maintenance of Certification, Part 4, Clinical Modules.

- \*Performance in Practice: Physician Assessment Module for the Screening of Adults With Substance Use Disorder Feb 2011–Feb 2017
- \*Performance in Practice: Physician Assessment Module for the Assessment and Treatment of Adults With Substance Use Disorder Feb 2011–Feb 2017
- \*Performance in Practice: Physician Assessment Tool for the Care of Adults With Schizophrenia June 2012–June 2018
- \*Performance in Practice: Physician Practice Assessment Tool for the Assessment and Treatment of Adults at Risk for Suicide and Suicide-Related Behaviors March 2011–March 2017
- \*Performance in Practice: Clinical Module for the Care of Patients With Major Depressive Disorder July 2012–July 2018
- Performance in Practice: Clinical Module for the Care of Patients With Posttraumatic Stress Disorder Aug 2013–Aug 2019
- Improvement in Medical Practice (PIP): Physician Practice Assessment Tools for Screening of Adults With Substance Use Disorder June 2015–June 2018
- Improvement in Medical Practice (PIP): Physician Practice Assessment Tool for the Assessment and Treatment of Adults With Substance Use Disorder June 2015–June 2018
